# Supplementary material for: The Impact of COVID-19 on Individuals With Intellectual and Developmental Disabilities: Clinical and Scientific Priorities
Source: Atypon-hosted journal article supplement (doi:10.1176/appi.ajp.2020.20060780), 2020-08-28
Supplement: appi.ajp.2020.20060780.ds001.pdf [file appi.ajp.2020.20060780.ds001.pdf]

 


Psychiatry Online
