# Supplementary material for: The Impact of COVID-19 on Individuals With Intellectual and Developmental Disabilities: Clinical and Scientific Priorities
Source: Atypon-hosted journal article supplement (doi:10.1176/appi.ajp.2020.20060780), 2020-08-28
Supplement: appi.ajp.2020.20060780.ds001.pdf [file appi.ajp.2020.20060780.ds001.pdf]

**Table S1. Selected Web Sites for Information on COVID-19 and Developmental Disabilities**

- <https://www.cdc.gov/coronavirus/2019-ncov/prevent-getting-sick/disinfecting-your-home.html>  
*Cleaning and Disinfecting Your Home, CDC*
- <https://selfadvocacyinfo.org/wp-content/uploads/2020/03/Plain-Language-Information-on-Coronavirus.pdf>  
*COVID-19 Information By and For People with Disabilities, Green Mountain Self-Advocates*
- <https://www.cdc.gov/coronavirus/2019-ncov/community/group-homes.html>  
*Guidance for Group Homes for Individuals with Disabilities, CDC*
- <https://www.cdc.gov/coronavirus/2019-ncov/hcp/direct-service-providers.html>  
*Guidance for Direct Service Providers, CDC*
- <https://aucd.org>  
*Association of University Centers on Disabilities*
- <https://sites.ed.gov/idea/idea-files/supplemental-fact-sheet-addressing-risk-covid-19-preschool-elementary-secondary-schools-serving-children-disabilities-march-21-2020/>  
*COVID-19 information on Individuals with Disabilities Education Act web site*

<https://doi.org/10.1111/jir.12740>

*A peer-reviewed report of early positive results from an organization providing continuous support to over 11,000 individuals with IDD to reduce exposure and spread of infection. The methods implemented included enhanced infection control procedures across 2400 homes, communicated to employees using multi-faceted channels including an electronic resource library, mobile and web applications, paper postings in locations, live webinars and direct mail. Using custom-built software applications enabling patient tracking, client and employee cases and exposures, the organization leveraged current public health recommendations to identify cases and to suppress transmission, which included the use of personal protective equipment. Open access reference: Mills et al. *J Intellectual Disability Res* 2020; 64: 489-496, Supporting individuals with intellectual and developmental disability during the first 100 days of the COVID-19 outbreak in the USA.*

**Table S2. Research priorities articulated in NOT-OD-20-097 Notice of Special Interest (NOSI) Administrative Supplements and Urgent Competitive Revisions for Research on the 2019 Novel Coronavirus and the Behavioral and Social Sciences, partial listing (<https://grants.nih.gov/grants/guide/notice-files/not-od-20-097.html> )**

- Evaluation of strategies used by health systems to reallocate resources, rapidly train practitioners, communicate preventative practices, and maintain adherence to public health and clinical guidelines, with an interest in those that serve high-risk groups.
- Ascertainment of downstream health effects of personal and economic impacts of the COVID-19 response on substance use/abuse, mental health, and stress-related physical disorders, as well as interpersonal relations (e.g. interpersonal violence, child abuse),
- Appraisal of how COVID-19 related changes in the social, economic, communication, institutional and policy environments differentially affect the health and welfare of people in vulnerable populations
- Studies of how social distancing requirements affect the care and well-being of vulnerable populations and their caregivers.
- Studies of how social distancing guidelines and requirements are implemented and impact vulnerable populations in institutions, group settings, and other non-traditional settings.
- Studies examining the extent to which existing age, racial, ethnic, sex, gender identity, sexual orientation, socioeconomic or geographic health disparities are exacerbated by the COVID-19 epidemic, including studies of differential access to and use of healthcare services, and differential access to communication and information about, attitudes toward, and uptake of preventive measures.

**Table S3. Provisions of COVID-19 Emergency Supplemental Funding Packages that impact Individuals with IDD**

Coronavirus Preparedness and Response Supplemental Appropriations Act

Rebalances funds that were moved when the crisis began (including programs as diverse as the National Institute on Disability, Independent Living, and Rehabilitation Research and funding for emergency heat)

Families First Coronavirus Response Act

Enhances Unemployment Insurance to people unable to work, including some access for caregivers of individuals with IDD, and increased funding for food security programs

Coronavirus Aid, Relief, and Economic Security Act (or CARES Act)

Extends monies that “follow the person” to provide support to professionals who assist disabled individuals in the hospital, provides stimulus payments to individuals receiving SSI, and includes resources for Centers for Independent Living as well as Aging and Disability Resource Centers

Paycheck Protection Program and Health Care Enhancement Act

Addresses revenue deficits for hospitals treating COVID-19 patients

**Table S4. The Following Directors and Co-Directors of U.S. Intellectual and Developmental Disabilities Research Centers (<https://www.nichd.nih.gov/research/supported/eksiddrc>) Endorsed and Contributed to this Communication:**

- Albert Einstein College of Medicine – Steven Walkley, Sophie Molholm
- Baylor College of Medicine – Rodney Samaco, David Nelson, Huda Zoghbi
- Children’s Hospital Boston – Mustafa Sahin, Scott Pomeroy
- Children’s Hospital of Philadelphia – Michael Robinson, Robert Schultz
- Children’s Research Institute/Children’s National Medical Center – William Gaillard, Vittorio Gallo
- Kennedy Krieger Institute and Johns Hopkins University – Ali Fatemi, Bradley Schlaggar
- University of California, Davis – Leonard Abbeduto
- University of California, Los Angeles – Susan Bookheimer, Harley Kornblum
- University of Kansas, Lawrence – John Colombo, Peter Smith, Matthew Mosconi
- University of North Carolina, Chapel Hill – Joseph Piven, Gabriel Dichter
- University of Washington – Michael Guralnick, Daniel Doherty
- University of Wisconsin, Madison –Bradley Christian, Qiang Chang
- Vanderbilt University Medical Center – Jeffrey Neul, Laurie Cutting
- Washington University – John Constantino, Christina Gurnett
